# Supplementary material for: TFAM deficiency in dendritic cells leads to mitochondrial dysfunction and enhanced antitumor immunity through cGAS-STING pathway
Source: PubMed Central journal article supplement — J Immunother Cancer. 2023 Mar 1;11(3):e005430. doi: 10.1136/jitc-2022-005430 (PMC9980377; doi:10.1136/jitc-2022-005430), 2023-03-01
Supplement: jitc-2022-005430supp008.pdf [file jitc-2022-005430supp008.pdf]

## 1 Supplemental Methods

### 2 Cell isolation and culture

3 Murine bone marrow-derived dendritic cells (BMDCs), murine T cells from the  
4 spleen, and Lewis lung cancer (LLC), mouse melanoma B16-F10 and the  
5 OVA-transfected clone derived from E.G7 (E.G7-OVA) cell lines were used for *in*  
6 *vitro* studies. BMDCs and T cells were isolated and cultured in RPMI-1640 medium.  
7 Briefly, the bone marrow cells from mice were pooled, filtered through a 70  $\mu$ m nylon  
8 mesh filter (Corning, USA), centrifuged and resuspended in ACK lysis buffer for 5  
9 min of incubation on ice. After rinsing by medium, the bone marrow cells were  
10 cultured in RPMI-1640 medium supplemented with 10% heat-inactivated FBS (Gibco,  
11 USA), 100 U/mL penicillin/streptomycin (Gibco, USA) and additions of 1 mM  
12 sodium pyruvate, 50  $\mu$ M  $\beta$ -mercaptoethanol ( $\beta$ -ME), 20 ng/mL GM-CSF and 15  
13 ng/mL IL-4 for BMDCs differentiation. The non-adherent and loosely adherent cells  
14 were collected as BMDCs. The spleen was isolated from mice, grinded and filtered  
15 through a 70  $\mu$ m nylon mesh filter for lymphocytes processing using a lymphocyte  
16 separation solution kit (Dakewe, China). The isolated lymphocytes were cultured in  
17 RPMI-1640 medium supplemented with 10% heat-inactivated FBS, 100 U/mL  
18 penicillin/streptomycin and additions of 1 mM pyruvate, 50 Mm  $\beta$ -ME and 100 U/mL  
19 IL-2 for T cells differentiation. Murine LLC, B16-F10, and E.G7-OVA cells were  
20 purchased from American Type Culture Collection (ATCC) and cultured in DMEM  
21 except for E.G7-OVA cells in RPMI-1640 medium. G418 (0.4 mg/ml) was added to  
22 the E.G7-OVA culture. All cells were maintained in a humidified atmosphere  
23 containing 5% CO<sub>2</sub> at 37°C.

### 24 Tumor model

25 To mimic tumor lung metastasis models, female or male *Tfam*<sup>-/-</sup> mice were  
26 intravenously injected with a total of 5 × 10<sup>5</sup> LLC cells or 2 × 10<sup>5</sup> B16-F10 cells.  
27 Specially, for survival statistics of the lung metastasis B16-F10 model, mice were  
28 intravenously injected with a total of 5 × 10<sup>5</sup> B16-F10 cells. *Tfam*<sup>fl/fl</sup> littermates and

29 wild type (WT) mice were used as control. The survival rate was figured. After  
30 inoculation for 24 days (LLC models) or 14 days (B16-F10 models), the mice were  
31 sacrificed and lung metastasis was evaluated. To investigate the immunological  
32 responses, mice were subcutaneously injected with 10  $\mu\text{g}$  OVA in PBS in a total  
33 volume of 100  $\mu\text{L}$  (*Tfam*<sup>-/-</sup> + OVA/Control + OVA group) or 100  $\mu\text{L}$  PBS alone  
34 (*Tfam*<sup>-/-</sup> + PBS/Control + PBS group) antigen to the left flank on days of 0, 14, and 21.  
35 Then subcutaneously injected with a total of  $5 \times 10^5$  E.G7-OVA cells to the right flank  
36 on day 28. Tumor size was monitored and measured using a vernier caliper every  
37 third day. Mice were sacrificed between days of 16 and 19. For Survival statistics,  
38 mice were humanely sacrificed when the volume of tumors reached about 2000  $\text{mm}^3$ .

39 Further, we blocked the STING signaling in mice via C-176 (MCE, #HY-112906),  
40 a strong and covalent STING inhibitor<sup>1</sup>. Mice were intravenously injected with a total  
41 of  $5 \times 10^5$  LLC cells, and then intraperitoneally administrated with 13.4 mg/kg of  
42 C-176 dissolved in 10% DMSO and 90% saline containing 20% SBE- $\beta$ -CD or equal  
43 volume of vehicle (10% DMSO and 90% saline containing 20% SBE- $\beta$ -CD) daily  
44 during the course<sup>2</sup>.

#### 45 **Stimulation of BMDCs and T cells**

46 To study the induced responses by tumor cells to BMDCs from *Tfam*<sup>-/-</sup> mice, the  
47 tumor supernatant (TS) of LLC cells was harvested, filtrated by 0.22  $\mu\text{m}$  filters, and  
48 added to the BMDCs at a final dilution of 1:3 for 24 h of incubation. To block the  
49 STING signal, 2  $\mu\text{M}$  H-151 (MCE, #HY-112693) was added to the diluted TS. The  
50 supernatant and cells were collected for further study. To remove nucleic acid in TS,  
51 the filtrated TS was incubated with 10 U/mL SuperNuclease (Sino Biological, China)  
52 for 1-2 h at 37°C.

53 To investigate cell-mediated immune responses, T cells from spleens of *Tfam*<sup>-/-</sup> and  
54 WT mice immunized with 10  $\mu\text{g}$  OVA in PBS were obtained, and CD8<sup>+</sup> T cells were  
55 sorted using a negative magnetic bead screening kit (Stemcell Technologies, #19853)  
56 following the manufacturer's instruction. Cells were cultured with OVA<sub>257-264</sub> peptides

57 (10 µg/mL) for 24 h or 72 h. The supernatant and cells were collected for further  
58 study.

### 59 **Cell staining for flow cytometry (FCM)**

60 Mice were euthanized for lungs with tumor nodules and tumor tissues processing.  
61 Briefly, tissues were dissected from mice, minced on ice into small pieces of less than  
62 1 mm<sup>3</sup> and then suspended in a 10 mL of digestion buffer consisting of 1 mg/mL  
63 collagenase I (Gibco), 0.5 mg/mL collagenase IV (Gibco) and 40 U/mL DNase I  
64 (Sigma) in RPMI-1640 medium (Gibco, USA). The digestion buffer was incubated  
65 with frequent agitation at 37°C for 1 h. Subsequently, the suspensions were passed  
66 through a 70 µm nylon mesh filter and centrifuged at 400×g for 5 min. All pelleted  
67 cells were resuspended into ice-cold PBS and counted. Besides, mice were also  
68 euthanized for inguinal lymph nodes and spleens processing. Cells were collected  
69 from inguinal lymph nodes and spleens by grinding and passing through a 70 µm  
70 nylon mesh filter. For *in vitro* studies, cultured cells were collected at the indicated  
71 end point.

72 Cells were pre-treated with FcR blocking (BD Biosciences, #553142, USA) to  
73 avoid non-specific staining. Then the cells were incubated with live/dead staining dye  
74 (Invitrogen, #L34974) for 30 min at 4 °C. For surface staining, cells were stained with  
75 the indicated antibodies at 4 °C. For intracellular staining, cells pre-treated with  
76 Brefeldin A for 4-6 h were then fixed using 4% paraformaldehyde (PFA) and  
77 permeabilized by the 1% Triton X-100, and were incubated with  
78 fluorochrome-labeled antibodies specific for the mouse. Fluorescence minus one  
79 (FMO) control was used for gates strategy. Samples were performed using BD  
80 LSRFortessa, and data were analyzed by FlowJo 10.7.1 or Novoexpress. Antibodies  
81 used for FCM analysis included BV650 anti-CD45, PerCP-Cy5.5 anti-CD11b, BV711  
82 anti-CD11c, PE anti-F4/80, APC anti-MHCII, BV421 anti-Ly6C, BV510 anti-Ly6G,  
83 FITC anti-CD206, PerCP-Cy5.5 anti-CD3, BV421 anti-CD4, BV510 anti-CD8, FITC  
84 anti-PD-1, PE anti-IFN-γ, APC anti-GzmB, PE anti-CD69, FITC anti-Foxp3, FITC

85 anti-CD62L, APC anti-CD44, APC anti-11c, PE anti-CD25, APC anti-CD40,  
86 PE-anti-CD86, FITC anti-CD80, PerCP-Cy5.5-anti-CD115, and BV421-anti-CD135  
87 (all from BD Biosciences or BioLegend, USA), and APC H-2K<sup>b</sup> MuLV p15E  
88 Tetramer (MBL, Japan). For TFAM staining, permeabilized cells were stained by  
89 rabbit anti-TFAM antibody (Abcam, UK) followed by PE anti-rabbit IgG (BioLegend,  
90 USA). For apoptosis analysis, cells were stained by FITC Annexin V Apoptosis  
91 Detection Kit I (BD Biosciences, USA).

## 92 **Histology, immunohistochemistry (IHC) and immunofluorescence**

93 Lungs were fixed in 4% PFA at RT, embedded in paraffin and sectioned at 3  $\mu\text{m}$ , or  
94 frozen in OCT compound (Sakura Finetek, Japan) and sectioned at 10  $\mu\text{m}$ .  
95 Haematoxylin and eosin (H&E) staining was used to assess pathology and lung tumor  
96 metastasis. The lung metastatic area was calculated using ImageJ software.

97 Paraffin-embedded sections were incubated with 3% H<sub>2</sub>O<sub>2</sub> to block endogenous  
98 peroxidases, and then subjected to an EDTA buffer for antigen retrieval.  
99 OCT-embedded sections were post-fixed with ice-cold acetone and incubated with 3%  
100 H<sub>2</sub>O<sub>2</sub>. Cell slides were fixed with 4% PFA. The samples were then incubated with 5%  
101 goat serum for blocking. Primary antibodies used for immunohistochemistry or  
102 immunofluorescence analysis included rabbit anti-Hsp60 (Abcam, #ab137706),  
103 hamster anti-CD11c (BioLegend, #117301), rabbit anti-CD8 $\alpha$  (CST, #98941), rabbit  
104 anti-CD45 (Servicebio, #GB11066), rabbit anti-CD3 (Servicebio, #GB13014), rabbit  
105 anti-CD31 (Abcam, #ab28364) and rabbit anti-cleaved caspase-3 (CST, #9664). The  
106 immunofluorescent images were captured using a Zeiss LSM880 laser confocal  
107 microscope, and immunohistochemistry and H&E images were captured using the  
108 Panoramic MIDI scanner (3DHISTECH, Hungary).

## 109 **ELISA assay**

110 To investigate the serum antibodies against the OVA, mice immunized with 10  $\mu\text{g}$   
111 OVA on days of 0,14 and 21 and sera were collected by retro-orbital puncture on day  
112 28. OVA was performed to coat flat-bottom 96-well plates (NUNC-MaxiSorp,

113 Thermo Fisher Scientific) at a final concentration of 10 µg/mL in 50 mM carbonate  
114 coating buffer (pH 9.6) at 4 °C overnight. Then blocking solution containing 5% BSA  
115 in PBST was added for 1 h of incubation at RT. Diluted sera were added and  
116 incubated at 37 °C for 1 h. Antibodies, including anti-mouse IgG, IgG1, IgG2b, IgG2c  
117 and IgG3 horseradish peroxidase (HRP)-conjugated antibody, were diluted 1:5,000 in  
118 blocking solution and added to wells (100 µl per well) for 1 h of incubation at RT.  
119 After development using 3,3',5,5'-tetramethylbiphenyldiamine (TMB) and subsequent  
120 stop of reactions by 50 µL/well of 1 M H<sub>2</sub>SO<sub>4</sub> solution, the absorbance was measured  
121 at 450 nm using a microplate reader (Biotek, USA).

122 Cytokines *in vitro* were measured following the manufacturer's instructions,  
123 including IL-6 Mouse Uncoated ELISA Kit (Thermo Fisher Scientific, #88-7064-88),  
124 TNF alpha Mouse Uncoated ELISA Kit (Thermo Fisher Scientific, #88-7324-88),  
125 IL-1 beta Mouse Uncoated ELISA Kit (Thermo Fisher Scientific, #88-7013-88), IFN  
126 gamma 'Femto-HS' High Sensitivity Mouse Uncoated ELISA Kit (Thermo Fisher  
127 Scientific, #88-8314-88), and Mouse IL-12 p40 ELISA Kit (Abcam, #ab236717).

#### 128 **Antigen uptake function detection of BMDCs**

129 BMDCs were treated with 1mg/mL FITC-Dextran (Sigma, #60842-46-8) at 37°C for  
130 1 h, rinsed with ice-cold PBS and then fixed with 4% PFA. The fluorescent images  
131 were captured using a fluorescence microscopy. For FCM analysis, BMDCs treated  
132 with FITC-Dextran at 4°C were performed as control of the spontaneous  
133 FITC-dextran phagocytic.

#### 134 **T cell proliferation and cross-presentation assay**

135 To investigate the antigen cross-presentation, the CD8<sup>+</sup> T cell proliferation assay was  
136 performed<sup>3</sup>. Briefly, BMDCs were isolated from *Tfam*<sup>-/-</sup> and control mice on day 28  
137 pre-immunized with OVA (10 µg) on days of 0, 14 and 21. After incubation for 7 days  
138 for BMDCs maturation, 10 µg/mL of OVA<sub>257-264</sub> peptide was added to cells following  
139 by 24 h of incubation at 37 °C, and then BMDCs were collected and counted.

140 Simultaneously, CD8<sup>+</sup> T cells were isolated from spleens of OT-I mice, sorted using a  
141 negative magnetic bead screening kit (Stemcell Technologies, #19853), and then  
142 labelled with CFSE (Invitrogen, #C34554) by incubation with CFSE (2.5 μM,  
143 prepared with 0.1% FBS/PBS solution) for 15 min in the dark at 37°C. For co-culture  
144 system preparation, 2×10<sup>5</sup> BMDCs and 1×10<sup>6</sup> CD8<sup>+</sup> T cells were mixed in 1 mL of  
145 medium and seeded into a 24-well plate following by 72 h of incubation at 37 °C.  
146 Terminally, the cells were collected for flow cytometric analysis of CFSE  
147 fluorescence value of T cells.

#### 148 **T cell activation assay**

149 To detect the activation of OVA-specific cytotoxic T cells (CTLs), splenic  
150 lymphocytes were isolated from mice on day 28 pre-immunized with OVA (10 μg) on  
151 days of 0, 14 and 21. Subsequently, 10 μg/mL of OVA<sub>257-264</sub> peptide was added to  
152 activate cells following by 72 h of incubation at 37 °C. Terminally, the cells were  
153 collected and labeled with T-select MHC Tetramer /H-2K<sup>b</sup>-OVA (SIINFEKL) (MBL,  
154 #TS-5001-1C) and anti-CD8 antibody for flow cytometric analysis.

#### 155 **Adoptive immunity assay**

156 To investigate the adoptive immunity, control and *Tfam*<sup>-/-</sup> mice were immunized with  
157 10 μg of OVA on days of 0, 14 and 21, and then CD8<sup>+</sup> T cells were isolated from the  
158 immunized spleen on days of 28, 30 and 32 and sorted using a negative magnetic bead  
159 screening kit (Stemcell Technologies, #19853). A total of 5 × 10<sup>5</sup> E.G7-OVA cells was  
160 subcutaneously injected to the right flank of WT mice. Meanwhile, a total of 5 × 10<sup>6</sup>  
161 CD8<sup>+</sup> T cells from control or *Tfam*<sup>-/-</sup> mice was intravenously injected to the mice on  
162 1-day ahead-inoculation of tumor cells, and on 1-day and 3-days post-inoculation of  
163 tumor cells, respectively. All the tumour grew in the WT.

164 For adoption of DCs and macrophages, BMDCs and macrophages were differentiated  
165 from bone marrow cells with 100 ng/ml FLT-3L (R&D Systems, USA) or 20 ng/ml  
166 M-CSF (novoprotein, China) respectively. Totally 1 × 10<sup>6</sup> *Tfam*<sup>-/-</sup>/control BMDCs or

167 macrophages were intravenously injected into WT LLC lung metastasis models on  
168 day 0, 1, 4, 7, and 14. Mice were sacrificed on day 24 to collect the lungs. The gross  
169 appearance of lungs were photographed, and the lung metastatic nodules were  
170 counted. Three representative lungs were selected from each group for formaldehyde  
171 fixation, paraffin embedding, and HE staining. The lung metastatic area was  
172 quantified by ImageJ software.

### 173 **Quantitative PCR (qPCR)**

174 Total RNA was extracted using the RNA Extraction Kit (TianGen, #DP419), and  
175 first-strand cDNA was synthesized using a PrimeSript<sup>TM</sup> RT reagent kit (Takara,  
176 #RR036) following manufacturer's protocols. qPCR was performed in triplicate at a  
177 20  $\mu$ L total volume using SsoFast EvaGreen (Bio-Rad, #1725202) on a Bio-Rad  
178 iCycler RT-PCR detection system. Mitochondrial DNA copy number was measured  
179 using primers specific to nuclear Tert and the D-loop region of mtDNA. The  
180 expression levels of target genes were normalized to  $\beta$ -actin using  $2^{-\Delta\Delta CT}$  method. All  
181 primers used in this study are listed in Supplementary Table 2.

### 182 **Measurement of cytosolic mitochondrial DNA (mtDNA)**

183 Cytosolic mtDNA was extracted from BMDCs using the mitochondrial DNA isolation  
184 kit (Abcam, #ab65321), purified using the DNeasy Blood & Tissue Kit (Qiagen,  
185 #USA), and quantified by PCR using a TaqMan probe as previously described <sup>4</sup>.

### 186 **ROS measurement**

187 The ROS level was detected using a DCF-DA (Sigma, #35845) probe. Briefly, cells  
188 seeded in 96-well plates were incubated with or without the tumor supernatant (TS)  
189 for 24 h, and then treated with 10  $\mu$ M DCF-DA (prepared with phenol red-free  
190 medium) for 30 min. The fluorescence intensity was determined by a microplate  
191 reader (Biotek, USA) at the excitation/emission wavelengths of 485/530 nm. All  
192 procedures were carried out in the dark.

### 193 **Extracellular oxygen consumption measurement**

194 The mitochondrial metabolism was measured using the Cell Metabolism kit (Abcam),  
195 and the extracellular oxygen consumption rates (OCR) were measured using the  
196 Extracellular Oxygen Consumption Assay kit (Abcam). All procedures were  
197 performed according to the manufacturer's protocols, and the fluorescence intensity  
198 was determined by a microplate reader (Biotek, USA).

#### 199 **Characterization of mitochondrial structure**

200 Transmission electron microscopy was used to characterize the mitochondrial  
201 structure. Briefly, murine BMDCs were fixed with 2.5% glutaraldehyde, dehydrated  
202 and then embedded in resin. The ultrathin section (~50 nm) was obtained and  
203 performed on a copper grid by staining with uranyl acetate and lead citrate. The  
204 images were captured using a JEM-2100PLUS electron microscope (JEOL, Japan).

#### 205 **Western blot**

206 Total protein was extracted using the ice-cold enhanced RIPA lysis buffer  
207 supplemented with a phosphatase inhibitor cocktail (Millipore, #524629) and  
208 measured using the Bradford dye (BIO-RAD, #5000205) by Eppendorf  
209 Bio-photometer Plus (Eppendorf). Western blotting was performed using standard  
210 protocols according to the manufacturer's recommendations. Primary antibodies used  
211 for western blot analysis included rabbit, rabbit anti-Stat1 (CST, #9172), rabbit  
212 anti-STING (CST, #13647), rabbit anti- Phospho-TBK1 (CST, #5483), rabbit  
213 anti-TBK1 (CST, #3504), rabbit anti-IRF-3 (CST, #4302), rabbit anti-Phospho-IRF-3  
214 (CST, #79945) and mouse anti- $\beta$ -actin (Santa Cruz, #sc-47778). The  $\beta$ -actin protein  
215 was used as the loading control.

#### 216 **RNA sequencing**

217 Total RNA was isolated from BMDCs (treated with or without TS ) of *Tfam*<sup>-/-</sup> and  
218 control mice using the TRIzol reagent kit. RNA integrity was assessed using the RNA  
219 Nano 6000 Assay Kit by the Bioanalyzer 2100 system (Agilent Technologies, CA,  
220 USA), and samples with RIN scores above 6 and a minimum total RNA of 100 ng



221 were used for further library construction. PCR products were purified using the  
222 AMPure XP system, and library quality was assessed using the Agilent Bioanalyzer  
223 2100 system. Libraries were sequenced on Illumina Novaseq6000 (Illumina)  
224 following PE150 sequencing strategy. Differential expression analysis was performed  
225 using the DESeq2 R package (1.20.0), and mRNAs with a FDR <0.001 and  
226 fold-change >2 were considered as significant differential expression between two  
227 groups. GSEA (gene set enrichment analysis) were used for functional annotation of  
228 the differentially expressed genes. The experiment was conducted in triplicate.

229

### 230 **References**

- 231 1. Haag SM, Gulen MF, Reymond L, et al. Targeting STING with covalent  
232 small-molecule inhibitors. *Nature*. 2018;559(7713):269-273. doi:  
233 10.1038/s41586-018-0287-8.
- 234 2. Wei B, Xu L, Guo W, et al. SHP2-Mediated Inhibition of DNA Repair Contributes  
235 to cGAS-STING Activation and Chemotherapeutic Sensitivity in Colon Cancer.  
236 *Cancer Res*. 2021;81(12):3215-3228. doi: 10.1158/0008-5472.CAN-20-3738.
- 237 3. Moroishi T, Hayashi T, Pan WW, et al. The Hippo Pathway Kinases LATS1/2  
238 Suppress Cancer Immunity. *Cell*. 2016;167(6):1525-1539 e17. doi:  
239 10.1016/j.cell.2016.11.005.
- 240 4. Wei X, Shao B, He Z, et al. Cationic nanocarriers induce cell necrosis through  
241 impairment of Na(+)/K(+)-ATPase and cause subsequent inflammatory response. *Cell*  
242 *Res*. 2015;25(2):237-53. doi: 10.1038/cr.2015.9.

243

244 **Table.1 Primer used in PCR for genotyping**

| Gene name        | Forward sequences           | Reaction      |
|------------------|-----------------------------|---------------|
|                  | Reverse sequences           |               |
| <i>mTfam</i>     | CTT GTA GGT CCT CCC CAC TG  | A             |
|                  | ACA GCA CCA ACC CAA AGT GT  | A             |
| <i>mLyz2-cre</i> | CCC AGA AAT GCC AGA TTA CG  | Mutant (A)    |
|                  | CTT GGG CTG CCA GAA TTT CTC | Common (A, B) |
|                  | TTA CAG TCG GCC AGG CTG AC  | Wild type (B) |

245

246 **Table.2 Primer used in qPCR**

| Gene name      | Forward sequences         |
|----------------|---------------------------|
|                | Reverse sequences         |
| $\beta$ -actin | CTGAGAGGGAAATCGTGCGT      |
|                | CCACAGGATTCCATACCCAAGA    |
| <i>mTfam</i>   | AAGGATGATTGGCTCAGG        |
|                | GGCTTTGAGACCTAACTGG       |
| <i>mIfna4</i>  | CTTTCCTCATGATCCTGGTAATGAT |
|                | AATCCAAAATCCTTCCTGTCCTTC  |
| <i>mIfnb1</i>  | CCCTATGGAGATGACGGAGA      |
|                | CCCAGTGCTGGAGAAATTGT      |
| <i>mIrf7</i>   | CAATTCAGGGGATCCAGTTG      |
|                | AGCATTGCTGAGGCTCACTT      |
| <i>mCxcl10</i> | CCAAGTGCTGCCGTCATTTTC     |
|                | GGCTCGCAGGGATGATTTCAA     |
| <i>mIrf3</i>   | CGGAAAGAAGTGTTGCGGTTAGC   |
|                | CAGGCTGCTTTTGCCATTGGTG    |
| <i>mDdx58</i>  | GAGTACCACTTAAAGCCAGAG     |
|                | AATCCATTTCTTCAGAGCATCC    |

|                 |                           |
|-----------------|---------------------------|
| <i>mTnfa</i>    | CATCTTCTCAAATTCGAGTGACAA  |
|                 | CCAGCTGCTCCTCCACTTG       |
| <i>mIl1b</i>    | TGGACCTTCCAGGATGAGGACA    |
|                 | GTTCATCTCGGAGCCTGTAGTG    |
| <i>mIl12</i>    | CCATTGAACTGGCGTTGGAAG     |
|                 | ACTTGAGGGAGAAGTAGGAATGG   |
| m.mtDNA Dloop 3 | TCCTCCGTGAAACCAACAA       |
|                 | AGCGAGAAGAGGGGCATT        |
| m.nucDNA Tert   | CTAGCTCATGTGTCAAGACCCTCTT |
|                 | GCCAGCACGTTTCTCTCGTT      |

247
