# Supplementary figures and images for: TFAM deficiency in dendritic cells leads to mitochondrial dysfunction and enhanced antitumor immunity through cGAS-STING pathway
Source: PubMed Central journal article supplement — J Immunother Cancer. 2023 Mar 1;11(3):e005430. doi: 10.1136/jitc-2022-005430 (PMC9980377; doi:10.1136/jitc-2022-005430), 2023-03-01

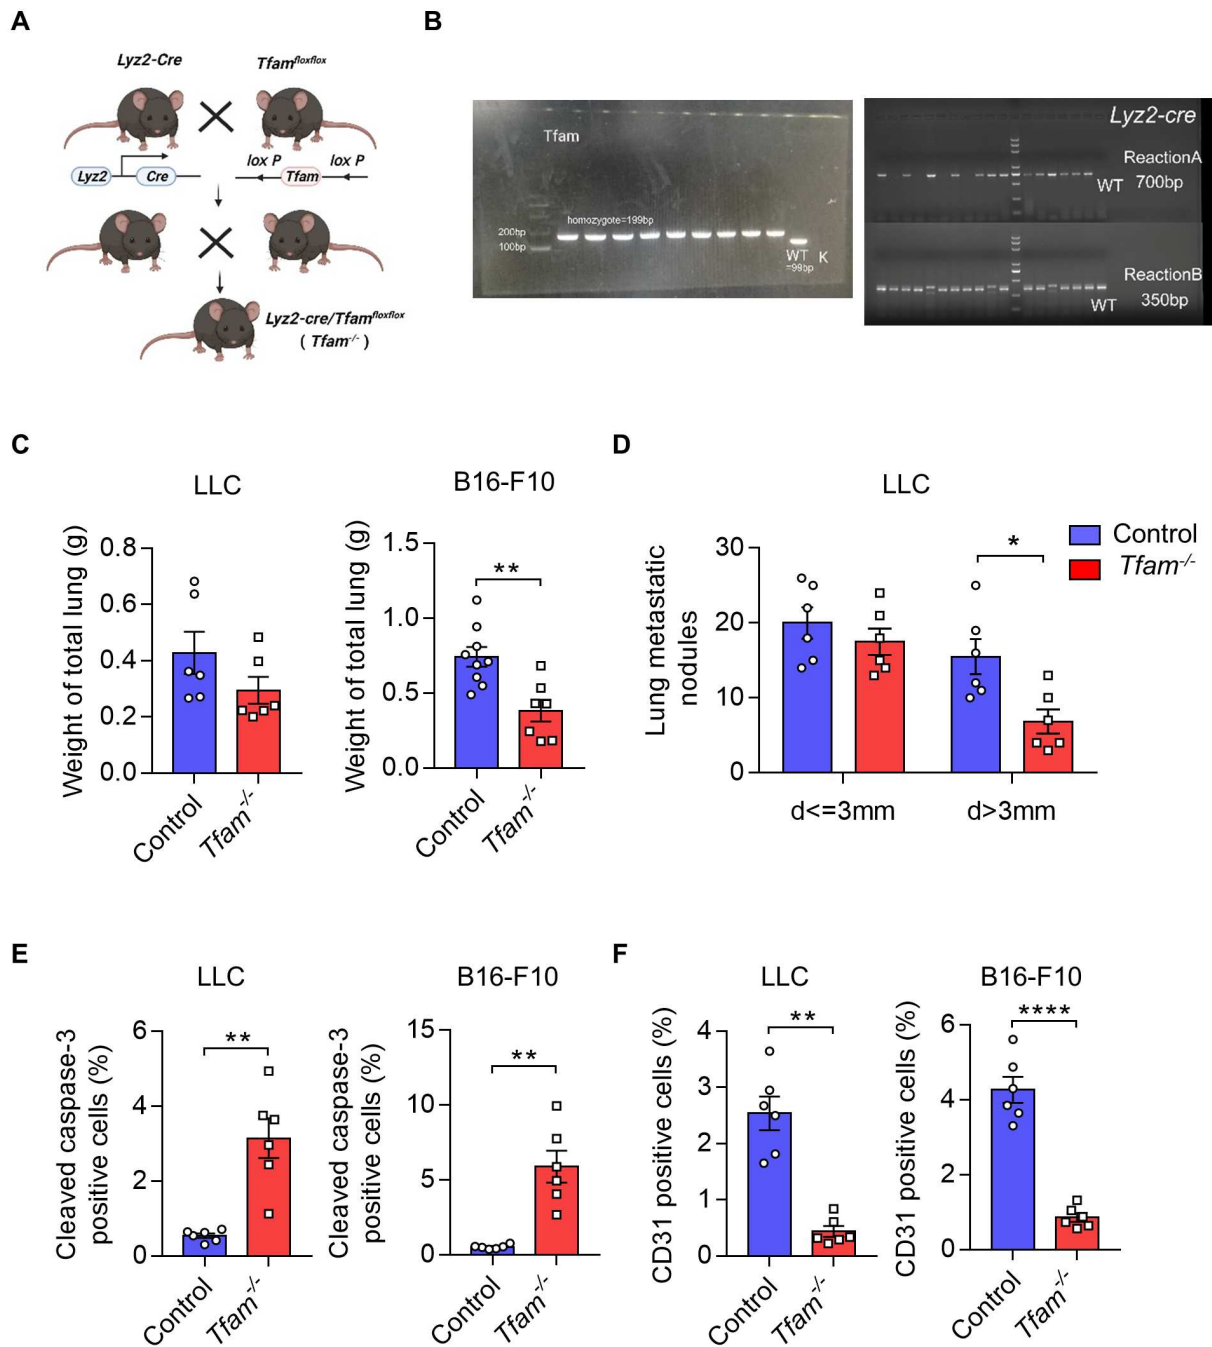

Supplement: jitc-2022-005430supp001.pdf [file jitc-2022-005430supp001.pdf]

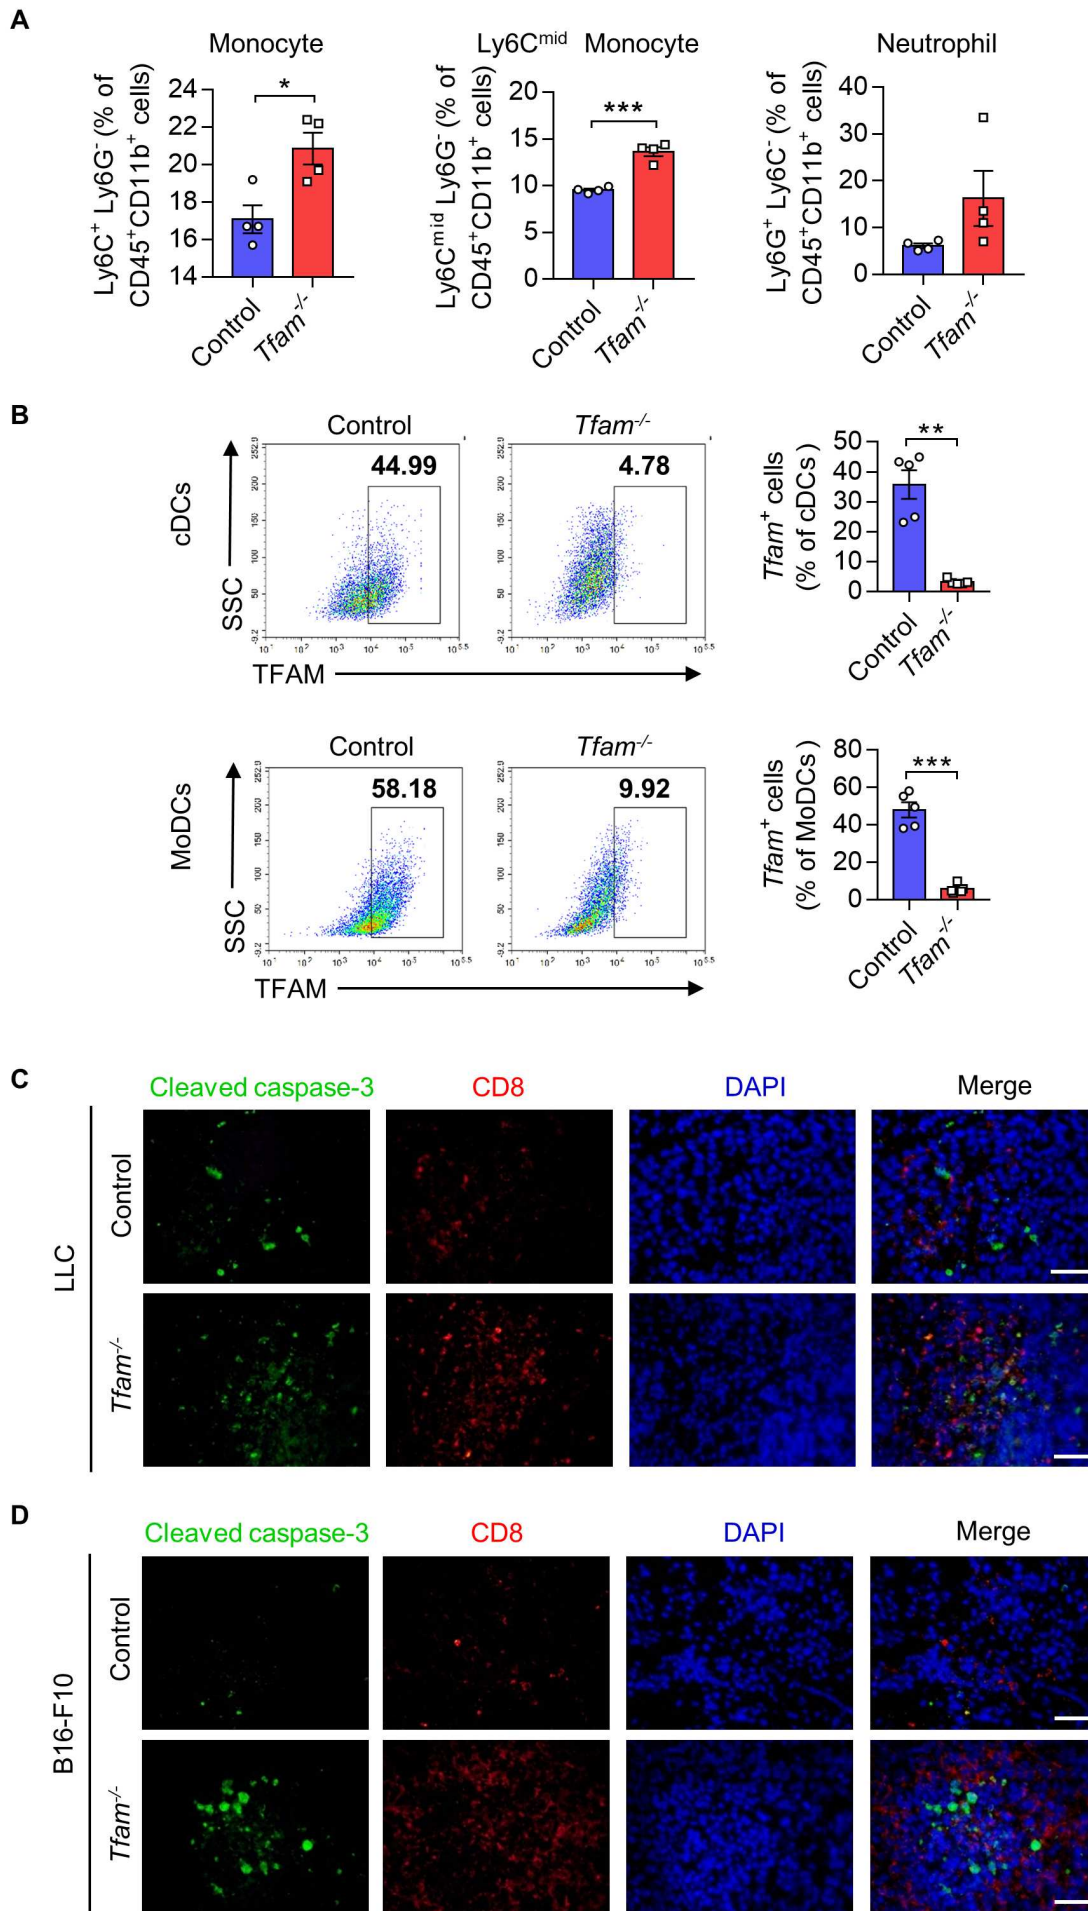

Supplement: jitc-2022-005430supp002.pdf [file jitc-2022-005430supp002.pdf]

**A**

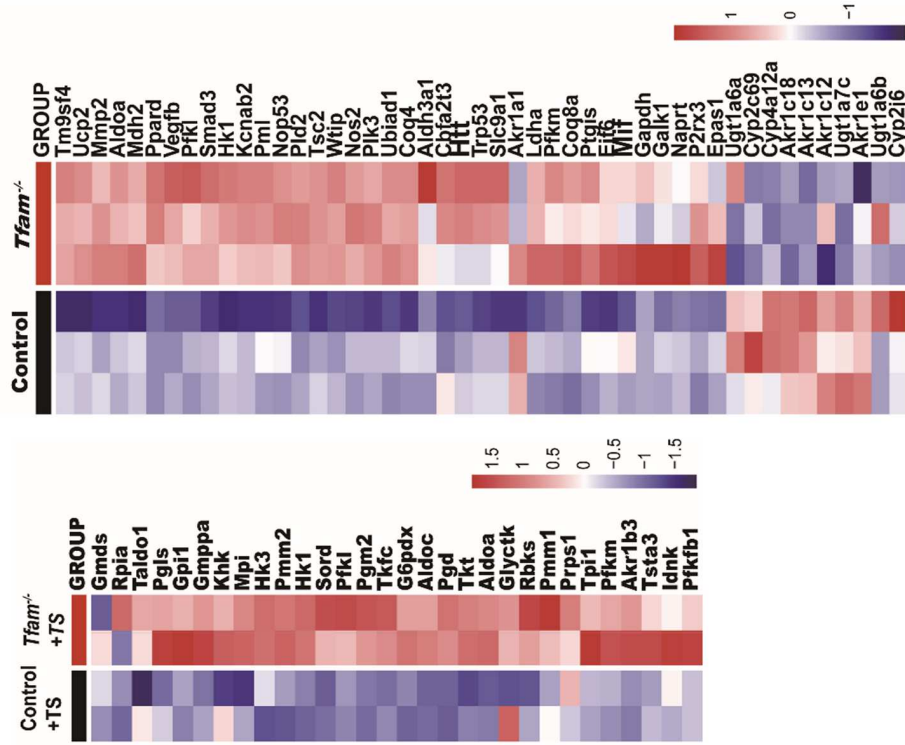

**B**

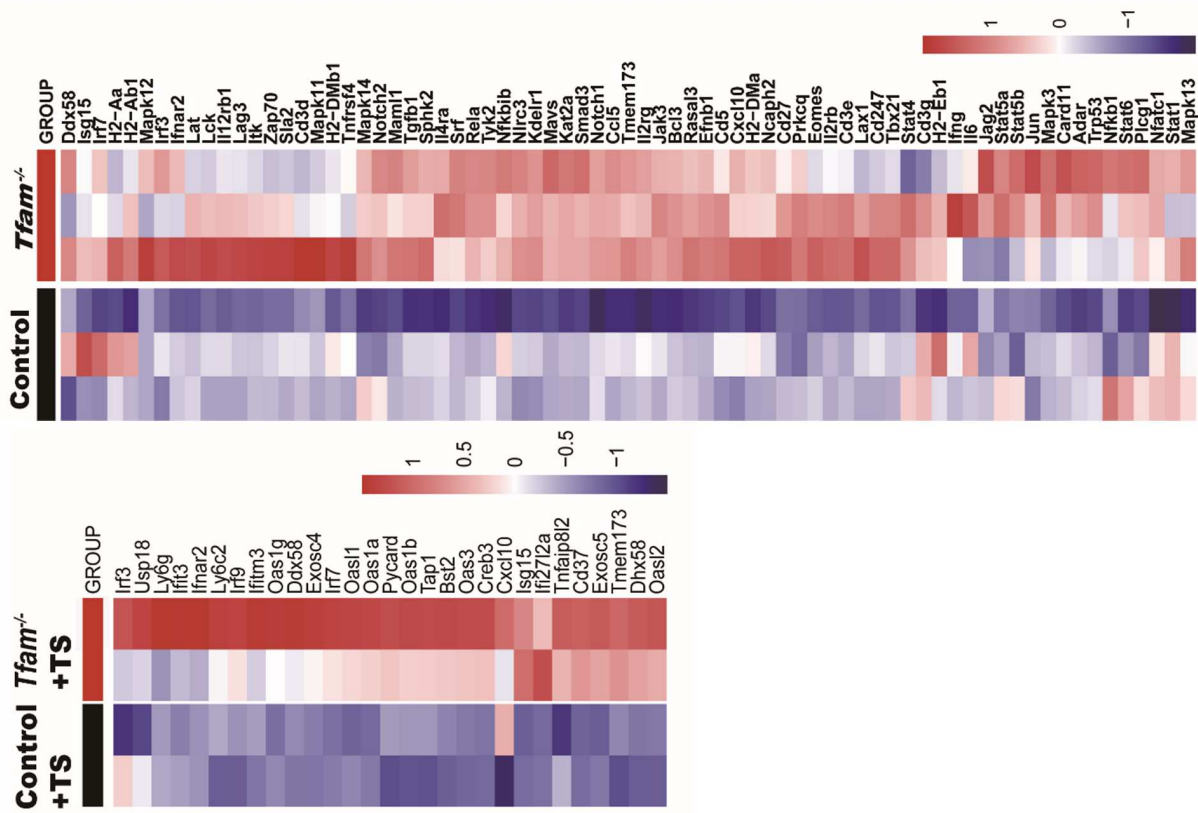

Supplement: jitc-2022-005430supp006.pdf [file jitc-2022-005430supp006.pdf]
