# Supplementary figures and images for: TFAM deficiency in dendritic cells leads to mitochondrial dysfunction and enhanced antitumor immunity through cGAS-STING pathway
Source: HighWire-hosted journal article supplement (doi:10.1136/jitc-2022-005430), 2023-03-01

**A**

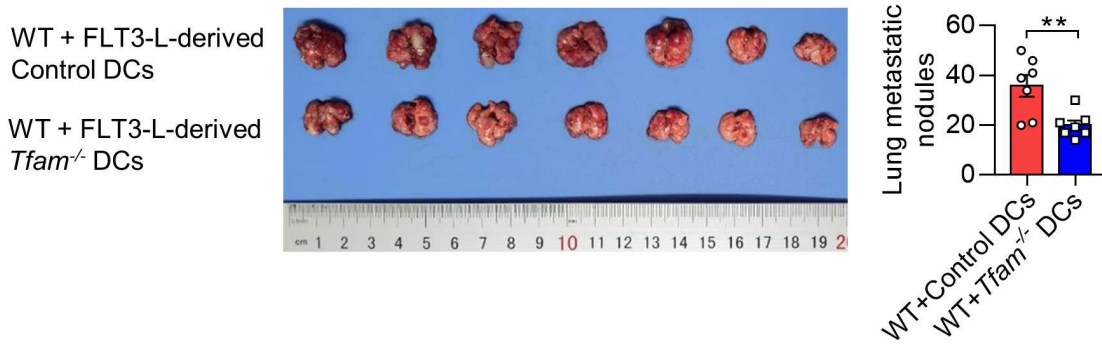

**B**

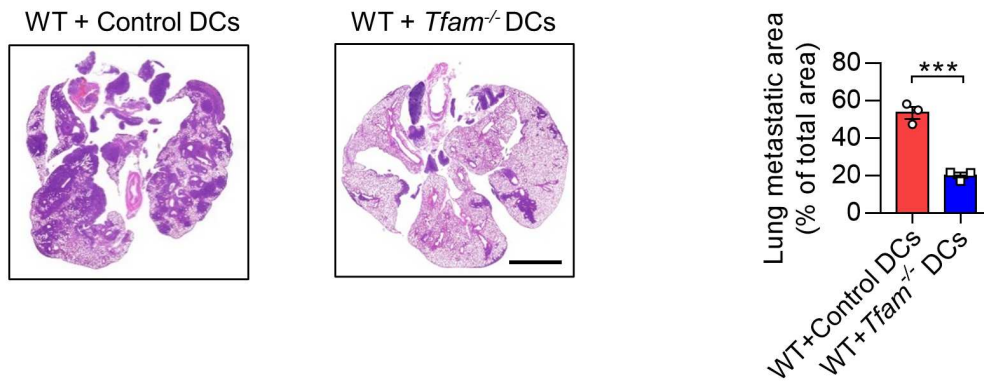

**C**

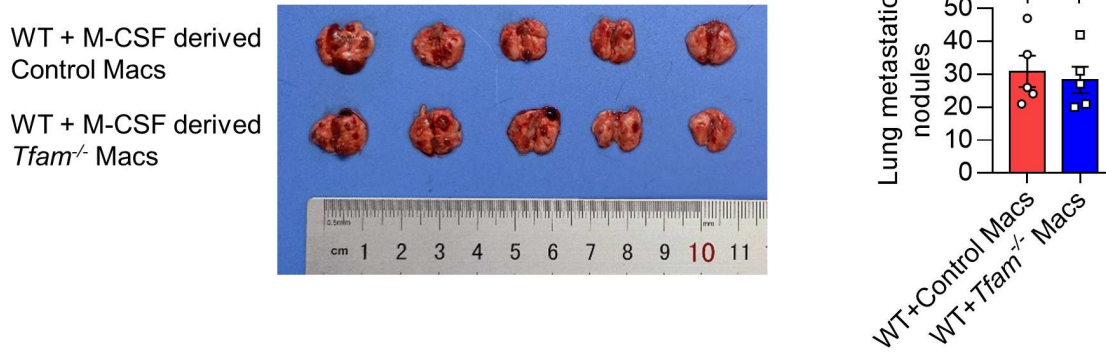

Supplement: jitc-2022-005430supp005_data_supplement.pdf [file jitc-2022-005430supp005_data_supplement.pdf]

A

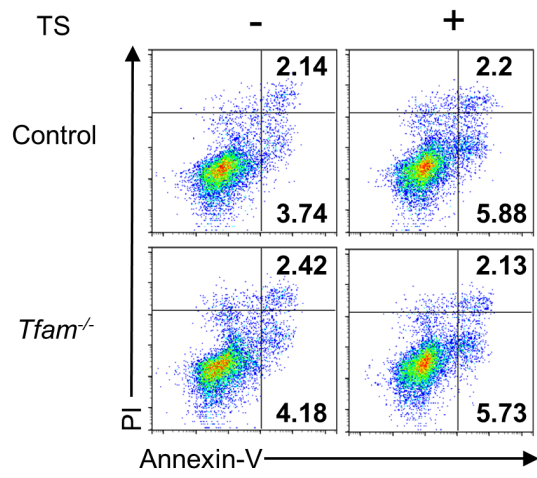

B

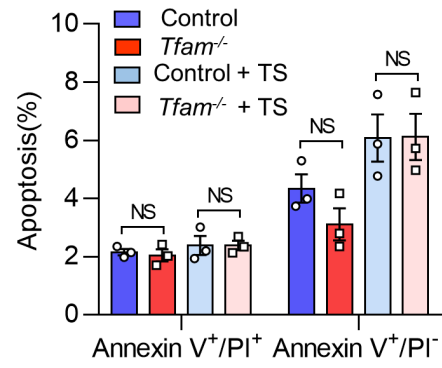

Supplement: jitc-2022-005430supp007_data_supplement.pdf [file jitc-2022-005430supp007_data_supplement.pdf]
